# Supplementary material for: Development and Optimization of Zein Nanoparticles for Gastric Delivery and Controlled Release of Styrax Liquidus
Source: Research Square preprint supplement (doi:10.21203/rs.3.rs-7902987/v1), 2025-11-10
Supplement: Supplementary file 1 [file d3a083d9c8867ead4031f72e.docx]

**Tables**

**Table 1.**

| **Method** | **Independent variables** | **Coded values** | | | | | |
| --- | --- | --- | --- | --- | --- | --- | --- |
| **-2** | **-1** | | **0** | **1** | **2** |
| **Nanoprecipitation (NP)** | A- Zein concentration (mg/ml) | 5 | - | | 7.5 | - | 10 |
| B- Styrax Liquidus raito (%) | 0.5 | 1 | 2 | 5 | 7.5 | 10 |
| C- Flow rate (ml/dk) | 50 | - | | 100 | - | 150 |
| D- Mixing rate (rpm) | 100 | - | | 200 | - | 300 |
| **Flash Nanoprecipitation (FNP)** | A- Zein concentration (mg/ml) | 5 | - | | 7.5 | - | 10 |
| B- Styrax Liquidus ratio (%) | 3 | - | | 5 | - | 7.5 |
| C- Flow rate (ml/dk) | 50 | - | | 100 | - | 200 |
| D- Mixing rate (rpm) | 250 | - | | 500 | - | 1000 |

**Table 2.**

|  | **Nanoprecipitation (NP)** | | | |  | **Flash Nanoprecipitation (FNP)** | | | |
| --- | --- | --- | --- | --- | --- | --- | --- | --- | --- |
| **Exp.** | **A (mg/ml)** | **B (%)** | **C (ml/min)** | **D (rpm)** |  | **A (mg/ml)** | **B (%)** | **C (ml/min)** | **D (rpm)** |
| **1** | 10 | 5 | 50 | 200 |  | 5 | 5 | 200 | 250 |
| **2** | 5 | 5 | 150 | 200 |  | 5 | 3 | 100 | 500 |
| **3** | 7.5 | 10 | 100 | 200 |  | 7.5 | 7 | 200 | 500 |
| **4** | 10 | 5 | 100 | 100 |  | 7.5 | 7 | 100 | 250 |
| **5** | 10 | 0.5 | 150 | 300 |  | 7.5 | 3 | 200 | 500 |
| **6** | 10 | 5 | 100 | 100 |  | 7.5 | 5 | 100 | 500 |
| **7** | 7.5 | 7.5 | 50 | 200 |  | 7.5 | 5 | 100 | 500 |
| **8** | 10 | 10 | 50 | 100 |  | 5 | 5 | 200 | 1000 |
| **9** | 10 | 10 | 150 | 200 |  | 7.5 | 7 | 100 | 1000 |
| **10** | 5 | 10 | 150 | 100 |  | 7.5 | 5 | 100 | 500 |
| **11** | 7.5 | 5 | 150 | 300 |  | 10 | 5 | 200 | 250 |
| **12** | 5 | 5 | 100 | 300 |  | 5 | 5 | 50 | 250 |
| **13** | 7.5 | 1 | 150 | 100 |  | 10 | 5 | 200 | 1000 |
| **14** | 5 | 2 | 100 | 200 |  | 10 | 5 | 100 | 250 |
| **15** | 5 | 10 | 50 | 300 |  | 7.5 | 5 | 100 | 500 |
| **16** | 5 | 7.5 | 50 | 100 |  | 10 | 7 | 50 | 500 |
| **17** | 7.5 | 10 | 100 | 200 |  | 5 | 7 | 50 | 500 |
| **18** | 7.5 | 5 | 50 | 100 |  | 7.5 | 3 | 50 | 1000 |
| **19** | 10 | 5 | 50 | 200 |  | 10 | 3 | 100 | 500 |
| **20** | 10 | 0.5 | 50 | 100 |  | 7.5 | 7 | 100 | 250 |
| **21** | 10 | 10 | 100 | 300 |  | 7.5 | 3 | 50 | 250 |
| **22** | 5 | 2 | 100 | 200 |  | 5 | 7 | 200 | 500 |
| **23** | 7.5 | 10 | 100 | 200 |  | 7.5 | 7 | 50 | 500 |
| **24** | 7.5 | 1 | 50 | 300 |  | 7.5 | 3 | 200 | 500 |
| **25** | 5 | 10 | 150 | 300 |  | 5 | 5 | 100 | 1000 |

A- Zein concentration, B- Styrax liquidus ratio, C- Flow rate, D- Mixing rate.

**Table 3.**

| **Kinetic Model** | **Zero-order** | **First-order** | **Higuchi** | **Hixson-Crowell** |
| --- | --- | --- | --- | --- |
| **Equation** | Qo - Qt=kot | logCo - logCt=kt/2.303 | Q=kHt1/2 | Qo1/3 - Qt1/3=kHCt |

**Table 4.**

|  | **Nanoprecipitation (NP)** | | | | | |  | **Flash Nanoprecipitation (FNP)** | | | | | |
| --- | --- | --- | --- | --- | --- | --- | --- | --- | --- | --- | --- | --- | --- |
| **Size (nm)** | **PDI (%)** | **ZP (mV)** | **EE (%)** | **Oral release (%)** | **Gastric release (%)** |  | **Size (nm)** | **PDI (%)** | **ZP (mV)** | **EE (%)** | **Oral release (%)** | **Gastric release (%)** |
| **Unfilled ZNPs** | 112.40±1.20 | 0.15±0.01 | -27.05±0.63 | - | - | - |  | 147.95±4.73 | 0.11±0.00 | 30.20±4.38 | - | - | - |
| **1** | 290.60±0.14 | 0.21±0.07 | -38.85±0.07 | 59.38±1.03 | 7.16 | 51.40 |  | 211.85±1.34 | 0.11±0.03 | 25.10±0.26 | 73.34±3.24 | 10.32 | 82.63 |
| **2** | 140.31±1.07 | 0.21±0.04 | -37.00±0.71 | 32.02±5.33 | 8.77 | 54.08 |  | 185.57±2.71 | 0.17±0.04 | 14.80±0.36 | 85.26±8.55 | 5.12 | 44.91 |
| **3** | 294.60±2.40 | 0.21±0.04 | -39.25±0.07 | 39.83±2.53 | 2.99 | 47.70 |  | 179.64±0.84 | 0.17±0.01 | 25.20±3.09 | 72.70±0.06 | 13.23 | 40.47 |
| **4** | 376.40±0.28 | 0.27±0.01 | -30.95±0.07 | 44.81±5.40 | 2.82 | 50.19 |  | 181.94±0.99 | 0.18±0.01 | 28.40±0.82 | 68.05±2.53 | 14.87 | 77.30 |
| **5** | 290.55±2.33 | 0.26±0.01 | -26.15±0.49 | 75.87±7.92 | 26.14 | 27.64 |  | 185.66±1.62 | 0.17±0.08 | 19.70±3.97 | 76.22±4.75 | 3.40 | 80.28 |
| **6** | 323.70±0.42 | 0.12±0.08 | -36.10±0.00 | 62.18±0.55 | 7.18 | 47.06 |  | 202.53±5.41 | 0.17±0.05 | 25.50±4.10 | 72.06±7.48 | 13.89 | 85.42 |
| **7** | 219.95±2.62 | 0.08±0.06 | -38.85±0.07 | 44.60±0.82 | 3.96 | 44.96 |  | 216.00±1.06 | 0.17±0.05 | 23.80±0.68 | 71.05±0.29 | 11.02 | 77.11 |
| **8** | 238.70±2.69 | 0.10±0.08 | -37.30±0.57 | 43.10±0.07 | 4.31 | 47.25 |  | 233.95±2.90 | 0.14±0.05 | 19.90±2.21 | 68.43±6.09 | 12.49 | 75.54 |
| **9** | 228.00±1.27 | 0.15±0.01 | -36.75±0.07 | 52.70±4.04 | 4.57 | 51.28 |  | 213.10±0.14 | 0.22±0.01 | 21.50±2.52 | 78.30±0.40 | 15.73 | 43.43 |
| **10** | 244.60±2.12 | 0.17±0.06 | -39.60±0.00 | 23.87±5.27 | 3.32 | 44.72 |  | 217.20±2.69 | 0.16±0.09 | 30.10±1.25 | 79.79±1.62 | 12.81 | 84.48 |
| **11** | 197.50±1.84 | 0.23±0.01 | -37.90±0.14 | 52.70±0.47 | 3.60 | 45.80 |  | 178.68±2.97 | 0.21±0.01 | 25.20±0.21 | 93.54±0.43 | 7.52 | 36.76 |
| **12** | 245.25±0.07 | 0.22±0.04 | -30.25±0.21 | 32.02±6.60 | * | 49.57 |  | 214.65±6.29 | 0.11±0.04 | 21.90±3.42 | 64.14±7.94 | 12.37 | 76.75 |
| **13** | 280.30±2.55 | 0.18±0.07 | -29.00±0.14 | 63.78±1.04 | 30.31 | 28.03 |  | 205.21±4.35 | 0.18±0.04 | 23.90±0.50 | 85.24±0.89 | 8.24 | 60.34 |
| **14** | 222.15±3.32 | 0.23±0.01 | -29.70±0.85 | 65.59±1.25 | 5.15 | 40.83 |  | 179.18±1.34 | 0.16±0.02 | 30.70±5.06 | 84.25±7.13 | 7.54 | 50.23 |
| **15** | 427.40±1.70 | 0.23±0.01 | -39.40±0.00 | 47.58±0.73 | 1.99 | 94.77 |  | 218.40±2.26 | 0.15±0.03 | 29.60±5.92 | 71.80±1.47 | 6.46 | 85.52 |
| **16** | 216.25±0.35 | 0.20±0.06 | -37.05±0.07 | 26.68±0.99 | * | 50.17 |  | 151.00±0.25 | 0.14±0.01 | 15.40±0.67 | 93.91±2.31 | 18.21 | 35.97 |
| **17** | 214.40±0.00 | 0.21±0.02 | -37.45±0.35 | 36.60±2.52 | 1.22 | 66.31 |  | 209.25±0.64 | 0.16±0.05 | 21.30±1.99 | 61.01±4.50 | 23.32 | 90.58 |
| **18** | 161.16±4.13 | 0.17±0.05 | -34.45±0.21 | 36.68±4.62 | 3.16 | 42.83 |  | 185.90±3.86 | 0.16±0.03 | 25.90±0.99 | 80.29±4.01 | 6.18 | 84.78 |
| **19** | 229.35±1.06 | 0.15±0.01 | -37.70±0.14 | 73.57±1.14 | * | 66.91 |  | 185.99±0.29 | 0.16±0.05 | 24.50±1.25 | 95.81±0.53 | 2.65 | 66.09 |
| **20** | 270.55±4.17 | 0.23±0.05 | -28.00±0.42 | 72.30±1.24 | 22 | * |  | 188.05±0.21 | 0.16±0.01 | 32.30±0.32 | 72.78±0.61 | 14.92 | 73.58 |
| **21** | 213.55±0.35 | 0.19±0.03 | -38.30±0.28 | 35.94±3.86 | 1.81 | 54.35 |  | 176.38±0.70 | 0.15±0.03 | 26.00±2.95 | 78.09±0.49 | 4.66 | 73.50 |
| **22** | 223.85±1.20 | 0.19±0.04 | -33.35±0.21 | 61.93±6.29 | 9.19 | 46.57 |  | 226.85±1.48 | 0.15±0.03 | 26.50±0.86 | 51.10±0.00 | 18.65 | 86.05 |
| **23** | 262.40±0.28 | 0.25±0.00 | -36.20±0.00 | 36.89±2.93 | 2.46 | 59.53 |  | 176.52±2.76 | 0.17±0.03 | 23.00±3.12 | 73.72±3.86 | 15.86 | 82.91 |
| **24** | 285.24±2.72 | 0.21±0.01 | -32.20±0.57 | 64.07±3.19 | * | 28.88 |  | 191.38±0.44 | 0.16±0.01 | 18.80±0.35 | 81.49±0.55 | 3.63 | 81.73 |
| **25** | 272.75±1.34 | 0.24±0.00 | -39.50±0.00 | 35.02±6.13 | 3.59 | 66.74 |  | 225.23±3.02 | 0.18±0.04 | 19.80±1.01 | 72.82±6.35 | 13.39 | 49.14 |
| **Opt.** | 225.59±0.07 | 0.14±0.03 | -34.85±5.67 | 43.99±0.58 | 2.60 | 61.40 |  | 181.29±4.08 | 0.12±0.04 | 25.87±2.52 | 82.64±1.88 | 3.50 | 64.06 |

*This run was not analyzed due to the gelation. PDI: Polydispersity index, ZP: Zeta potential, EE: Encapsulation efficiency, ZNPs: Zein nanoparticles, Opt.: Optimum point

**Table 5.**

|  | **Nanoprecipitation (NP)** | | | | | | |  | **Flash Nanoprecipitation (FNP)** | | | | | |
| --- | --- | --- | --- | --- | --- | --- | --- | --- | --- | --- | --- | --- | --- | --- |
|  | ***p* values** | | | | | | |  | ***p* values** | | | | | |
| **Source of variation** | **SD** | **Size (nm)** | **PDI** | **ZP (mV)** | **EE (%)** | **Oral release (%)** | **Gastric release (%)** |  | **Size (nm)** | **PDI** | **ZP (mV)** | **EE (%)** | **Oral release (%)** | **Gastric release (%)** |
| **Model:** Quadratic | 14 | 0.0194* | 0.0108* | 0.0095** | 0.0131* | 0.0002** | 0.0213* |  | 0.0001** | 0.0023** | 0.0041* | 0.0020** | 0.0006** | 0.0002** |
| **A-** Zein concentration (mg/ml) | 1 | 0.0287* | 0.7624 | 0.9052 | 0.0087** | 0.0391* | 0.5191 |  | < 0.0001** | 0.0556 | 0.0416* | < 0.0001** | 0.0254* | 0.0036** |
| **B-** Styrax liquidus ratio (%) | 1 | 0.8171 | 0.4895 | < 0.0001** | 0.0001** | < 0.0001** | 0.0003** |  | 0.3904 | 0.0117* | 0.4160 | 0.0286* | < 0.0001** | 0.0004** |
| **C-** Flow rate (ml/dk) | 1 | 0.5415 | 0.0394* | 0.4481 | 0.7922 | 0.0005** | 0.8290 |  | 0.1283 | 0.0266* | 0.8760 | 0.5592 | 0.0419* | 0.1050 |
| **D-** Mixing rate (rpm) | 1 | 0.7224 | 0.4012 | 0.3646 | 0.3379 | 0.0053** | 0.0621 |  | 0.0012** | 0.0104* | 0.0139* | 0.5685 | 0.2490 | 0.5658 |
| **AB** | 1 | 0.0063** | 0.0389* | 0.9899 | 0.7353 | 0.1051 | 0.4750 |  | 0.0006** | 0.5984 | 0.0028** | 0.0104 | 0.4326 | < 0.0001** |
| **AC** | 1 | 0.0841 | 0.0064** | 0.2012 | 0.4549 | 0.5476 | 0.6092 |  | 0.4424 | 0.0003** | 0.3747 | 0.7635 | 0.8465 | 0.0046** |
| **AD** | 1 | 0.0126* | 0.9291 | 0.3258 | 0.2479 | 0.7651 | 0.4132 |  | 0.1591 | 0.0199* | 0.5463 | 0.8246 | 0.7982 | 0.0093** |
| **BC** | 1 | 0.2983 | 0.3107 | 0.8221 | 0.6875 | 0.0012* | 0.1159 |  | 0.7672 | 0.9259 | 0.0439* | 0.5565 | 0.5193 | 0.0050** |
| **BD** | 1 | 0.7297 | 0.0568 | 0.5761 | 0.8189 | 0.0113* | 0.5709 |  | 0.2659 | 0.0819 | 0.0562 | 0.2953 | 0.8092 | 0.0023** |
| **CD** | 1 | 0.0060** | 0.0152* | 0.4188 | 0.5261 | 0.5059 | 0.1343 |  | 0.4300 | 0.1298 | 0.7542 | 0.1030 | 0.9021 | 0.0700 |
| **A²** | 1 | 0.1531 | 0.8262 | 0.6709 | 0.3549 | 0.7911 | 0.2058 |  | 0.2841 | 0.2972 | 0.0042** | 0.0166 | 0.3948 | 0.0002** |
| **B²** | 1 | 0.3588 | 0.1083 | 0.0433* | 0.1295 | 0.0005** | 0.0545 |  | 0.0002** | 0.0173* | 0.0316 | 0.2162 | 0.5206 | 0.0039** |
| **C²** | 1 | 0.1798 | 0.2608 | 0.1321 | 0.3548 | 0.0912 | 0.8897 |  | 0.0354 | 0.0094** | 0.1189 | 0.4685 | 0.3284 | 0.1482 |
| **D²** | 1 | 0.6822 | 0.0011** | 0.5049 | 0.0480* | 0.2010 | 0.2761 |  | 0.9511 | 0.8006 | 0.0420* | 0.8483 | 0.3048 | 0.6331 |
| **Residue** | 10 |  |  |  |  |  |  |  |  |  |  |  |  |  |
| **Lack of fit** | 5 | 0.4392 | 0.9102 | 0.4591 | 0.2156 | 0.5686 | 0.1620 |  | 0.3095 | 0.2664 | 0.8119 | 0.2120 | 0.7380 | 0.0263 |
| **R2** |  | 0.843 | 0.863 | 0.867 | 0.856 | 0.945 | 0.838 |  | 0.948 | 0.903 | 0.890 | 0.906 | 0.928 | 0.941 |
| **R2adj** |  | 0.632 | 0.671 | 0.681 | 0.656 | 0.869 | 0.613 |  | 0.876 | 0.768 | 0.737 | 0.776 | 0.828 | 0.859 |
| **C.V. %** |  | 14.77 | 12.49 | 6.54 | 18.60 | 46.40 | 22.08 |  | 3.64 | 7.08 | 9.55 | 6.39 | 20.21 | 9.77 |

*p<0.05, ** p<0.01, PDI: Polydispersity index, ZP: Zeta potential, EE: Encapsulation efficiency

**Table 6.**

| **Model** | **Zero-order** | | **First-order** | | **Higuchi** | | **Hixson-Crowell** | |
| --- | --- | --- | --- | --- | --- | --- | --- | --- |
| **Sample** | **R2** | **ko** | **R2** | **k1** | **R2** | **kH** | **R2** | **kHC** |
| **NP-opt** | 0.6269 | 0.1432 | 0.9210 | 0.1213 | 0.7354 | 5.4196 | 0.6225 | 0.0072 |
| **FNP-opt** | 0.9316 | 1.0307 | 0.9185 | 0.1114 | 0.9286 | 5.2791 | 0.9571 | 0.0137 |

**NP-opt.** represents to NP optimum zein nanoparticles; **FNP-opt.** represents to FNP optimum zein nanoparticles.

**Table 7.**

| **Sample** | **TPC**  (mg GAE/g) | **AC DPPH**  (mg TE/g) | **ACABTS**  (mg TE/ml) |
| --- | --- | --- | --- |
| **Styrax Liquidus (SL) (mg/ml)** | 26.40±0.17 | 7.07±2.29 | 0.27±0.01 |
| **NP-opt** | 2.388±0.06 | 0.864±0.003 | 0.14±0.003 |
| *In vitro* oral release | 0.868±0.02 | 0.410±0.01 |  |
| *In vitro* gastric release | 1.184±0.01 | 0.749±0.02 |  |
| **FNP-opt** | 1.839±0.25 | 0.910±0.004 | 0.21±0.003 |
| *In vitro* oral release | 1.281±0.24 | 0.323±0.01 |  |
| *In vitro* gastric release | 1.209±0.26 | 0.636±0.02 |  |

**NP-opt.** represents to NP optimum zein nanoparticles; **FNP-opt.** represents to FNP optimum zein nanoparticles.

**Table 8.**

| **% Urease enzyme inhibition** | | | | | |
| --- | --- | --- | --- | --- | --- |
| **Sample** | **25 µg/mL** | **50 µg/mL** | **100 µg/mL** | **200 µg/mL** | **IC50 (µg/mL)** |
| **Raw Styrax Liquidus** | 38.17±0.35 | 53.21±0.46 | 66.98±0.37 | 81.17±0.83 | 44.66c±0.70 |
| **Styrax Liquidus (SL)** | 42.05±0.55 | 54.37±0.67 | 72.35±0.52 | 85.63±0.39 | 42.59d±0.61 |
| **NP-ZNP** | 15.30±0.17 | 26.15±0.44 | 39.63±0.21 | 50.90±0.25 | 195.2a±0.57 |
| **FNP-ZNP** | 15.85±0.74 | 27.10±0.33 | 39.69±0.24 | 51.23±0.48 | 189.3b±0.82 |
| **Thiourea (Control)** | 63.84±0.49 | 72.57±0.65 | 85.20±0.98 | 92.70±0.77 | 8.62e±0.41 |

Inhibitory activities are expressed as Mean (IC50) ± SD (n = 3)

a,b,c,d,e means with different superscripts on same row differ significantly (*p* < 0.05)
